# Supplementary material for: Associations of Tinnitus Incidence with Use of Tumor Necrosis Factor-Alpha Inhibitors among Patients with Autoimmune Conditions
Source: MDPI journal article supplement (doi:10.3390/jcm12051935), 2023-03-01
Supplement: s1 [file s1]

**SUPPLEMENTAL MATERIAL *for* “Associations of tinnitus incidence with use of tumor necrosis factor-alpha inhibitors among patients with autoimmune conditions”**

- Table S1. Diagnostic and treatment codes used in the database search and propensity score matching
- Figure S1. Sample selection flowchart for the comparisons of tinnitus incidence in the main sample (No-TNF $\alpha$  and Yes-TNF $\alpha$ )
- Table S2. Demographic and clinical characteristics of the TNF $\alpha$ -FP and TNF $\alpha$ -AB cohorts, before and after propensity score matching
- Table S3. Demographic and clinical characteristics of the TNF $\alpha$ -AB cohort and a randomly selected No-TNF $\alpha$  cohort, before and after propensity score matching
- Table S4. Demographic and clinical characteristics of the TNF $\alpha$ -FP cohort and a randomly selected No-TNF $\alpha$  cohort, before and after propensity score matching
- Table S5. Demographic and clinical characteristics of the Yes-TNF $\alpha$  cohort and a randomly selected No-TNF $\alpha$  cohort (age 30-50 years), before and after propensity score matching
- Table S6. Demographic and clinical characteristics of the Yes-TNF $\alpha$  cohort and a randomly selected No-TNF $\alpha$  cohort (age 51-70 years), before and after propensity score matching
- Table S7. Demographic and clinical characteristics of the Yes-TNF $\alpha$  cohort with  $\geq 6$  months of anti-TNF $\alpha$  use and a randomly selected No-TNF $\alpha$  cohort, before and after propensity score matching
- Table S8. Demographic and clinical characteristics of the Yes-TNF $\alpha$  cohort with  $\geq 12$  months of anti-TNF $\alpha$  use and a randomly selected No-TNF $\alpha$  cohort, before and after propensity score matching
- Table S9. Demographic and clinical characteristics of the Yes-TNF $\alpha$  cohort with RA and a randomly selected No-TNF $\alpha$  cohort with RA, before and after propensity score matching
- Figure S2. Unmatched, basic-matched, and propensity score-matched comparisons of tinnitus incidence between patients with autoimmune disorders, by use of TNF $\alpha$ -AB (a-c) or TNF $\alpha$ -FP (d-f) compared to no anti-TNF $\alpha$  therapy
- Figure S3. Unmatched, basic-matched, and propensity score-matched comparisons of tinnitus incidence between patients with autoimmune disorders, by use of anti-TNF $\alpha$  for  $\geq 6$  months (a-c) or  $\geq 12$  months (d-f) compared to no anti-TNF $\alpha$  therapy
- Figure S4. Unmatched (a), basic-matched (b), and propensity score-matched (c) comparisons of tinnitus incidence between patients with RA, by use of anti-TNF $\alpha$  therapy or no anti-TNF $\alpha$  therapy

**Table S1. Diagnostic and treatment codes used database search and propensity score matching**

|                                              | ICD codes                                                                                                                                                                                                             | ATC codes |
|----------------------------------------------|-----------------------------------------------------------------------------------------------------------------------------------------------------------------------------------------------------------------------|-----------|
| <b>Tinnitus</b>                              | ICD9: 388.3; ICD10: H93.1                                                                                                                                                                                             |           |
| <b>Autoimmune disorders</b>                  |                                                                                                                                                                                                                       |           |
| Rheumatoid arthritis                         | ICD9: 714; ICD10: M06                                                                                                                                                                                                 | ---       |
| Psoriasis                                    | ICD9: 696; ICD10: L40                                                                                                                                                                                                 | ---       |
| Crohn's disease                              | ICD9: 555-558.99; ICD10: K50                                                                                                                                                                                          | ---       |
| Ulcerative colitis                           | ICD9: 556; ICD10: K51                                                                                                                                                                                                 | ---       |
| Noninfectious uveitis                        | ICD9: 364.04; ICD10: H20.04                                                                                                                                                                                           | ---       |
| Ankylosing spondylosis                       | ICD9: 720.0; ICD10: M45                                                                                                                                                                                               |           |
| <b>Anti-TNF<math>\alpha</math> therapies</b> |                                                                                                                                                                                                                       | L04AB     |
| Monoclonal antibodies                        |                                                                                                                                                                                                                       |           |
| Infliximab                                   |                                                                                                                                                                                                                       | L04AB02   |
| Adalimumab                                   |                                                                                                                                                                                                                       | L04AB04   |
| Certolizumab pegol                           |                                                                                                                                                                                                                       | L04AB05   |
| Golimumab                                    |                                                                                                                                                                                                                       | L04AB06   |
| Fusion protein                               |                                                                                                                                                                                                                       |           |
| Etanercept                                   |                                                                                                                                                                                                                       | L04AB01   |
| <b>CCI comorbidities</b>                     |                                                                                                                                                                                                                       |           |
| Malignancy                                   | ICD9: 140.x-172.x, 174.x-195.8, 200.x-208.x, 238.6; ICD10: C00.x-C26.x, C30.x-C34.x, C37.x-C41.x, C43.x, C45.x-C58.x, C60.x-C76.x, C81.x-C85.x, C88.x, C90.x-C97.x                                                    |           |
| Metastatic solid tumor                       | ICD9: 196.x-199.x; ICD10: C77.x-C80.x                                                                                                                                                                                 |           |
| Diabetes                                     | ICD9: 250.0-250.3, 250.8, 250.9; ICD10: E10.0, E10.1, E10.6, E10.8, E10.9, E11.0, E11.1, E11.6, E11.8, E11.9, E12.0, E12.1, E12.6, E12.8, E12.9, E13.0, E13.1, E13.6, E13.8, E13.9, E14.0, E14.1, E14.6, E14.8, E14.9 |           |
| Diabetes w/ complications                    | ICD9: 250.4-250.7; ICD10: E10.2-E10.5, E10.7, E11.2-E11.5, E11.7, E12.2-E12.5, E12.7, E13.2-E13.5, E13.7, E14.2-E14.5, E14.7                                                                                          |           |
| Congestive heart failure                     | ICD9: 398.91, 402.01, 402.11, 402.91, 404.01, 404.03, 404.11, 404.13, 404.91, 404.93, 425.4-425.9, 428.x; ICD10: I09.9, I11.0, I13.0, I13.2, I25.5, I42.0, I42.5-I42.9, I43.x, I50.x, P29.0                           |           |
| Myocardial infarction                        | ICD9: 410.x, 412.x; ICD10: I21.x, I22.x, I25.2                                                                                                                                                                        |           |
| Peripheral vascular disease                  | ICD9: 093.0, 437.3, 440.x, 441.x, 443.1-443.9, 447.1, 557.1, 557.9, V43.4; ICD10: I70.x, I71.x, I73.1, I73.8, I73.9, I77.1, I79.0, I79.2, K55.1, K55.8, K55.9, Z95.8, Z95.9                                           |           |

|                                  |                                                                                                                                                                                                                                           |
|----------------------------------|-------------------------------------------------------------------------------------------------------------------------------------------------------------------------------------------------------------------------------------------|
| Chronic pulmonary disease        | ICD9: 416.8, 416.9, 490.x-505.x, 506.4, 508.1, 508.8; ICD10: I27.8, I27.9, J40.x-J47.x, J60.x-J67.x, J68.4, J70.1, J70.3                                                                                                                  |
| Cerebrovascular disease          | ICD9: 362.34, 430.x-438.x; ICD10: G45.x, G46.x, H34.0, I60.x-I69.x                                                                                                                                                                        |
| Dementia                         | ICD9: 290.x, 294.1, 331.2; ICD10: F00.x-F03.x, F05.1, G30.x, G31.1                                                                                                                                                                        |
| Hemiparaplegia                   | ICD9: 334.1, 342.x, 343.x, 344.0-344.6, 344.9; ICD10: G04.1, G11.4, G80.1, G80.2, G81.x, G82.x, G83.0-G83.4, G83.9                                                                                                                        |
| Mild liver disease               | ICD9: 070.22, 070.23, 070.32, 070.33, 070.44, 070.54, 070.6, 070.9, 570.x, 571.x, 573.3, 573.4, 573.8, 573.9, V42.7; ICD10: B18.x, K70.0-K70.3, K70.9, K71.3-K71.5, K71.7, K73.x, K74.x, K76.0, K76.2-K76.4, K76.8, K76.9, Z94.4          |
| Moderate or severe liver disease | ICD9: 456.0-456.2, 572.2-572.8; ICD10: I85.0, I85.9, I86.4, I98.2, K70.4, K71.1, K72.1, K72.9, K76.5, K76.6, K76.7                                                                                                                        |
| Renal disease                    | ICD9: 403.01, 403.11, 403.91, 404.02, 404.03, 404.12, 404.13, 404.92, 404.93, 582.x, 583.0-583.7, 585.x, 586.x, 588.0, V42.0, V45.1, V56.x; ICD10: I12.0, I13.1, N03.2-N03.7, N05.2-N05.7, N18.x, N19.x, N25.0, Z49.0-Z49.2, Z94.0, Z99.2 |
| Peptic ulcer disease             | ICD9: 531.x-534.x; ICD10: K25.x-K28.x                                                                                                                                                                                                     |
| Rheumatic disease                | ICD9: 446.5, 710.0-710.4, 714.0-714.2, 714.8, 725.x; ICD10: M05.x, M06.x, M31.5, M32.x-M34.x, M35.1, M35.3, M36.0                                                                                                                         |
| HIV                              | ICD9: 042.x-044.x; ICD10: B20.x-B22.x, B24.x                                                                                                                                                                                              |

**Caption:** Abbreviations: ATC, Anatomical Therapeutic Chemical; CCI, Charlson Comorbidity Index; HIV, human immunodeficiency virus; ICD9/10, International Classification of Diseases, 9<sup>th</sup>/10<sup>th</sup> editions; TNF $\alpha$ , tumor necrosis factor-alpha.

**Figure S1. Sample selection flowchart for the comparisons of tinnitus incidence in the main sample (No-TNF $\alpha$  and Yes-TNF $\alpha$ )**

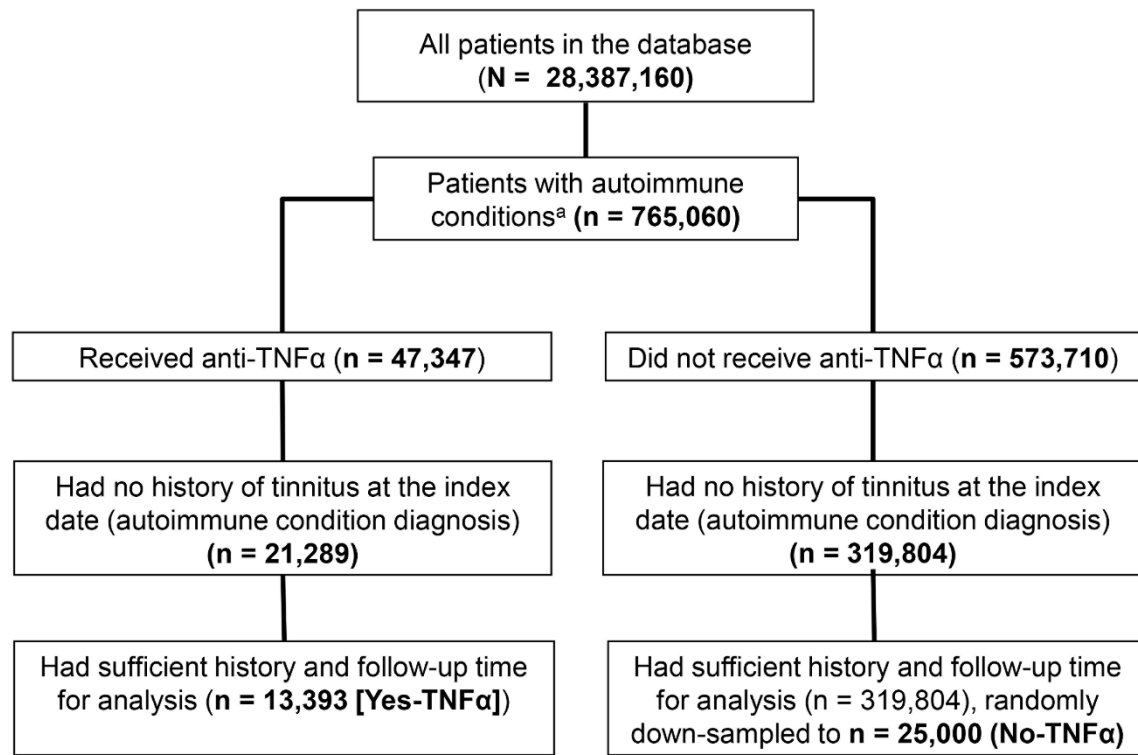

Abbreviations: TNF $\alpha$ , tumor necrosis factor-alpha. Note: <sup>a</sup> Autoimmune disorders (rheumatoid arthritis, psoriasis/psoriatic arthritis, ulcerative colitis, ankylosing spondylosis, Crohn's disease, and non-infective uveitis) and anti-TNF $\alpha$  therapies were identified based on diagnosis and drug codes listed in Table S1.

**Table S2. Demographic and clinical characteristics of the TNF $\alpha$ -FP and TNF $\alpha$ -AB cohorts, before and after propensity score matching**

|                                              | Autoimmune disorder + TNF $\alpha$ cohorts <sup>a</sup> |                            |                            |                            |
|----------------------------------------------|---------------------------------------------------------|----------------------------|----------------------------|----------------------------|
|                                              | Before matching                                         |                            | After matching             |                            |
|                                              | TNF $\alpha$ -FP<br>N=2397                              | TNF $\alpha$ -AB<br>N=9471 | TNF $\alpha$ -FP<br>N=1927 | TNF $\alpha$ -AB<br>N=1927 |
| <b>Duration of follow-up, mean [SD] days</b> | 1635.9 [1061.2]                                         | 1529.3 [1032]              | 1777.3 [1083.9]            | 1764.2 [1095.9]            |
| <b>Sex, n (%) female</b>                     | 1601 (66.8%)                                            | 6179 (65.2%)               | 1308 (67.9%)               | 1329 (69.0%)               |
| <b>Age, years</b>                            |                                                         |                            |                            |                            |
| Mean [SD]                                    | 56.5 [12.8]                                             | 52.3 [15.2]                | 56.0 [12.7]                | 56.7 [14.2]                |
| Distribution, n (%)                          |                                                         |                            |                            |                            |
| 18-29                                        | 68(2.8%)                                                | 898 (9.5%)                 | 59 (3.1%)                  | 112 (5.8%)                 |
| 30-39                                        | 199 (8.3%)                                              | 1236 (13.1%)               | 168 (8.7%)                 | 165 (8.6%)                 |
| 40-49                                        | 416 (17.4%)                                             | 1805 (19.1%)               | 347 (18.0%)                | 232 (12.0%)                |
| 50-59                                        | 725 (30.2%)                                             | 2331 (24.6%)               | 591 (30.7%)                | 522 (27.1%)                |
| 60-69                                        | 629 (26.2%)                                             | 2050 (21.6%)               | 504 (26.2%)                | 567 (29.4%)                |
| 70-79                                        | 300 (12.5%)                                             | 906 (10.1%)                | 221 (11.5%)                | 290 (15.0%)                |
| 80-89                                        | 60 (2.5%)                                               | 191 (2.0%)                 | 37 (1.9%)                  | 39 (2.0%)                  |
| <b>Race/ethnicity, n (%)</b>                 |                                                         |                            |                            |                            |
| White                                        | 1594 (66.5%)                                            | 6226 (65.7%)               | 1215 (63.1%)               | 1218 (63.2%)               |
| Black                                        | 151 (6.3%)                                              | 610 (6.4%)                 | 138 (7.2%)                 | 127 (6.6%)                 |
| Asian                                        | 14 (0.6%)                                               | 76 (0.8%)                  | 10 (0.6%)                  | 10 (0.6%)                  |
| Other <sup>b</sup>                           | 638 (26.6%)                                             | 2559 (27.0%)               | 562 (29.2%)                | 571 (29.6%)                |
| <b>CCI</b>                                   |                                                         |                            |                            |                            |
| Mean score [SD]                              | 2.5 [1.7]                                               | 1.9 [1.8]                  | 2.5 [1.7]                  | 2.6 [1.8]                  |
| Component disorders, n (%)                   |                                                         |                            |                            |                            |
| Malignancy                                   | 65 (2.7%)                                               | 167 (1.8%)                 | 58 (3.0%)                  | 59 (3.1%)                  |
| Metastatic solid tumor                       | 0 (0%)                                                  | 10 (0.1%)                  | 0 (0%)                     | 4 (0.1%)                   |
| Diabetes                                     | 313 (13.1%)                                             | 1005 (10.6%)               | 264 (13.7%)                | 293 (15.2%)                |
| Diabetes w/ complications                    | 58 (2.4%)                                               | 215 (2.3%)                 | 54 (2.8%)                  | 68 (3.5%)                  |
| Congestive heart failure                     | 36 (1.5%)                                               | 126 (1.3%)                 | 35 (1.8%)                  | 37 (1.9%)                  |
| Myocardial infarction                        | 21 (0.9%)                                               | 49 (0.5%)                  | 19 (1.0%)                  | 10 (0.5%)                  |
| Peripheral vascular disease                  | 56 (2.3%)                                               | 185 (2.0%)                 | 50 (2.6%)                  | 58 (3.0%)                  |
| Chronic pulmonary disease                    | 285 (11.9%)                                             | 1052 (11.0%)               | 245 (12.7%)                | 291 (15.1%)                |
| Cerebrovascular disease                      | 52 (2.2%)                                               | 188 (2.1%)                 | 45 (2.3%)                  | 61 (3.2%)                  |
| Dementia                                     | 1 (<0.1%)                                               | 12 (0.1%)                  | 1 (0.1%)                   | 5 (0.3%)                   |
| Hemiparaplegia                               | 6 (0.3%)                                                | 12 (0.1%)                  | 6 (0.3%)                   | 9 (0.5%)                   |
| Mild liver disease                           | 52 (2.2%)                                               | 193 (2.0%)                 | 45 (2.3%)                  | 48 (2.5%)                  |
| Severe liver disease                         | 3 (0.1%)                                                | 5 (0.1%)                   | 2(0.1%)                    | 2 (0.1%)                   |
| Renal disease                                | 63 (2.6%)                                               | 204 (2.2%)                 | 55 (2.9%)                  | 65 (3.8%)                  |

|                      |              |              |              |              |
|----------------------|--------------|--------------|--------------|--------------|
| Peptic ulcer disease | 11 (0.5%)    | 104 (1.1%)   | 10 (0.5%)    | 31 (1.6%)    |
| Rheumatic disease    | 1630 (68.0%) | 3981 (42.0%) | 1306 (67.8%) | 1057 (54.9%) |
| HIV                  | 3 (0.1%)     | 4 (<0.1%)    | 3 (0.2%)     | 1 (0.1%)     |

**Caption:** Grey highlight indicates characteristics with standardized mean difference >0.25 between groups. Patients in the two cohorts were propensity score-matched on sex, age, race/ethnicity, and CCI score. Abbreviations: AB, monoclonal antibody; anti-TNF $\alpha$ , tumor necrosis factor-alpha inhibitor; CCI, Charlson Comorbidity Index; EHR, electronic health records; FP, fusion protein; HIV, human immunodeficiency virus; SD, standard deviation. Note: <sup>a</sup> Demographic and clinical characteristics are among patients who met the inclusion criteria for history (90 days) and follow-up (6 months) in the EHR database. <sup>b</sup> 'Other' includes all other race/ethnicities as well as when this information was missing.

**Table S3. Demographic and clinical characteristics of the TNF $\alpha$ -AB cohort and a randomly selected No-TNF $\alpha$  cohort, before and after propensity score matching**

|                                              | Autoimmune disorders cohorts <sup>a</sup> |                              |                            |                             |
|----------------------------------------------|-------------------------------------------|------------------------------|----------------------------|-----------------------------|
|                                              | Before matching                           |                              | After matching             |                             |
|                                              | No-TNF $\alpha$<br>N=25,000 <sup>b</sup>  | TNF $\alpha$ -AB<br>N=10,859 | No-TNF $\alpha$<br>N=9,247 | TNF $\alpha$ -AB<br>N=9,247 |
| <b>Duration of follow-up, mean [SD] days</b> | 1422.2 [993.1]                            | 1567.6 [1042.5]              | 1390.2 [967.0]             | 1624.7 [1064.9]             |
| <b>Sex, n (%) female</b>                     | 16213 (64.9%)                             | 7186 (66.2%)                 | 6059 (65.5%)               | 6064 (65.6%)                |
| <b>Age, years</b>                            |                                           |                              |                            |                             |
| Mean [SD]                                    | 56.2 [17.5]                               | 52.2 [14.9]                  | 53.1 [17.2]                | 52.8 [15.0]                 |
| Distribution, n (%)                          |                                           |                              |                            |                             |
| 18-29                                        | 2534 (10.1%)                              | 978 (9.0%)                   | 1125 (12.2%)               | 830 (9.0%)                  |
| 30-39                                        | 2542 (10.2%)                              | 1360 (12.5%)                 | 1194 (12.9%)               | 1133 (12.3%)                |
| 40-49                                        | 3308 (13.2%)                              | 2097 (19.3%)                 | 1456 (15.7%)               | 1701 (18.4%)                |
| 50-59                                        | 4992 (20.0%)                              | 2764 (25.5%)                 | 1902 (20.6%)               | 2368 (25.6%)                |
| 60-69                                        | 5474 (21.9%)                              | 2356 (21.7%)                 | 1892 (20.5%)               | 2048 (22.1%)                |
| 70-79                                        | 4316 (17.3%)                              | 1092 (10.1%)                 | 1243 (13.4%)               | 973 (10.5%)                 |
| 80-89                                        | 1834 (7.3%)                               | 212 (2%)                     | 435 (4.7%)                 | 194 (2.1%)                  |
| <b>Race/ethnicity, n (%)</b>                 |                                           |                              |                            |                             |
| White                                        | 15421 (61.7%)                             | 7126 (65.6%)                 | 5967 (64.5%)               | 5919 (64.0%)                |
| Black                                        | 1924 (7.7%)                               | 679 (6.3%)                   | 611 (6.6%)                 | 595 (6.4%)                  |
| Asian                                        | 230 (0.9%)                                | 90 (0.8%)                    | 76 (0.8%)                  | 81 (0.9%)                   |
| Other <sup>c</sup>                           | 7425 (29.7%)                              | 2964 (27.3%)                 | 2593 (28%)                 | 2652 (28.7%)                |
| <b>CCI</b>                                   |                                           |                              |                            |                             |
| Mean score [SD]                              | 2.6 [2.4]                                 | 2 [1.8]                      | 2.2 [2.1]                  | 2 [1.8]                     |
| Component disorders, n (%)                   |                                           |                              |                            |                             |
| Malignancy                                   | 1158 (4.6%)                               | 185 (1.7%)                   | 290 (3.1%)                 | 170 (1.8%)                  |
| Metastatic solid tumor                       | 67 (0.3%)                                 | 11 (0.1%)                    | 11 (0.1%)                  | 10 (0.1%)                   |
| Diabetes                                     | 4156 (16.6%)                              | 1186 (10.9%)                 | 1252 (13.5%)               | 1017 (11.0%)                |
| Diabetes w/ complications                    | 1107 (4.4%)                               | 260 (2.4%)                   | 307 (3.3%)                 | 226 (2.4%)                  |
| Congestive heart failure                     | 962 (3.9%)                                | 146 (1.3%)                   | 208 (2.3%)                 | 128 (1.4%)                  |
| Myocardial infarction                        | 271 (1.1%)                                | 55 (0.5%)                    | 67 (0.7%)                  | 49 (0.5%)                   |
| Peripheral vascular disease                  | 1427 (5.7%)                               | 211 (1.9%)                   | 347 (3.8%)                 | 197 (2.1%)                  |
| Chronic pulmonary disease                    | 4916 (19.7%)                              | 1235 (11.4%)                 | 1573 (17.0%)               | 1061 (11.5%)                |
| Cerebrovascular disease                      | 1240 (5.0%)                               | 221 (2.0%)                   | 263 (2.8%)                 | 196 (2.1%)                  |
| Dementia                                     | 193 (0.8%)                                | 14 (0.1%)                    | 41 (0.4%)                  | 11 (0.1%)                   |
| Hemiparaplegia                               | 83 (0.3%)                                 | 12 (0.1%)                    | 18 (0.2%)                  | 9 (0.1%)                    |
| Mild liver disease                           | 848 (3.4%)                                | 237 (2.2%)                   | 270 (2.9%)                 | 203 (2.2%)                  |
| Severe liver disease                         | 47 (0.2%)                                 | 7 (0.1%)                     | 10 (0.1%)                  | 7 (0.1%)                    |
| Renal disease                                | 1376 (5.5%)                               | 241 (2.2%)                   | 336 (3.6%)                 | 213 (2.3%)                  |

|                      |              |              |              |              |
|----------------------|--------------|--------------|--------------|--------------|
| Peptic ulcer disease | 314 (1.3%)   | 110 (1.0%)   | 70 (0.8%)    | 105 (1.1%)   |
| Rheumatic disease    | 7241 (29.0%) | 4875 (44.9%) | 2737 (29.6%) | 4051 (43.8%) |
| HIV                  | 43 (0.2%)    | 4 (<0.1%)    | 14 (0.2%)    | 3 (0.03%)    |

**Caption:** The TNF $\alpha$ -AB cohort used infliximab, adalimumab, certolizumab pegol, or golimumab. Grey highlight indicates characteristics with standardized mean difference >0.25 between groups. Patients in the two cohorts were propensity score-matched on sex, age, race/ethnicity, and CCI score. Abbreviations: AB, monoclonal antibody; anti-TNF $\alpha$ , tumor necrosis factor-alpha inhibitor; CCI, Charlson Comorbidity Index; EHR, electronic health records; HIV, human immunodeficiency virus; SD, standard deviation. Notes: <sup>a</sup> Demographic and clinical characteristics are among patients who met the inclusion criteria for history (90 days) and follow-up (6 months) in the EHR database. <sup>b</sup> The cohort was comprised of 25,000 randomly selected patients with no anti-TNF $\alpha$  use. <sup>c</sup> Other<sup>c</sup> includes all other race/ethnicities as well as when this information was missing.



**Table S4. Demographic and clinical characteristics of the TNF $\alpha$ -FP cohort and a randomly selected No-TNF $\alpha$  cohort, before and after propensity score matching**

|                                              | Autoimmune disorders cohorts <sup>a</sup> |                             |                            |                             |
|----------------------------------------------|-------------------------------------------|-----------------------------|----------------------------|-----------------------------|
|                                              | Before matching                           |                             | After matching             |                             |
|                                              | No-TNF $\alpha$<br>N=25,000 <sup>b</sup>  | TNF $\alpha$ -FP<br>N=3,506 | No-TNF $\alpha$<br>N=3,477 | TNF $\alpha$ -FP<br>N=3,477 |
| <b>Duration of follow-up, mean [SD] days</b> | 1422.5 [993.1]                            | 1687.8 [1055.2]             | 1438.1 [981.6]             | 1689.5 [1056.8]             |
| <b>Sex, n (%) female</b>                     | 15981 (63.9%)                             | 2420 (69.0%)                | 2383 (68.5%)               | 2398 (69.0%)                |
| <b>Age, years</b>                            |                                           |                             |                            |                             |
| Mean [SD]                                    | 55.1 [17.1]                               | 55.4 [13.0]                 | 55.0 [17.2]                | 55.3 [13.0]                 |
| Distribution, n (%)                          |                                           |                             |                            |                             |
| 18-29                                        | 2418 (9.7%)                               | 135 (3.9%)                  | 365 (10.5%)                | 135 (3.9%)                  |
| 30-39                                        | 2571 (10.3%)                              | 316 (9.0%)                  | 397 (11.4%)                | 315 (9.1%)                  |
| 40-49                                        | 3460 (13.8%)                              | 667 (19.0%)                 | 442 (12.7%)                | 662 (19.0%)                 |
| 50-59                                        | 5095 (20.4%)                              | 1068 (30.5%)                | 672 (20.7%)                | 1058 (30.4%)                |
| 60-69                                        | 5536 (22.1%)                              | 853 (24.3%)                 | 766 (22.0%)                | 845 (24.3%)                 |
| 70-79                                        | 4239 (17.0%)                              | 395 (11.3%)                 | 534 (15.4%)                | 390 (11.2%)                 |
| 80-89                                        | 1681 (6.7%)                               | 72 (2.1%)                   | 213 (6.1%)                 | 72 (2.1%)                   |
| <b>Race/ethnicity, n (%)</b>                 |                                           |                             |                            |                             |
| White                                        | 15489 (62.0%)                             | 2300 (65.6%)                | 2302 (66.2%)               | 2280 (65.6%)                |
| Black                                        | 1920 (7.7%)                               | 199 (5.7%)                  | 221 (6.4%)                 | 197 (5.7%)                  |
| Asian                                        | 203 (0.8%)                                | 28 (0.8%)                   | 32 (0.9%)                  | 28 (0.8%)                   |
| Other <sup>c</sup>                           | 7388 (29.6%)                              | 979 (27.9%)                 | 922 (26.5%)                | 972 (28.0%)                 |
| <b>CCI</b>                                   |                                           |                             |                            |                             |
| Mean score [SD]                              | 2.6 [2.4]                                 | 2.4 [1.7]                   | 2.7 [2.4]                  | 2.4 [1.7]                   |
| Component disorders, n (%)                   |                                           |                             |                            |                             |
| Malignancy                                   | 1187 (4.8%)                               | 76 (2.2%)                   | 147 (4.2%)                 | 73 (2.1%)                   |
| Metastatic solid tumor                       | 69 (0.3%)                                 | 1 (<0.1%)                   | 13 (0.4%)                  | 1 (<0.1%)                   |
| Diabetes                                     | 4131 (16.5%)                              | 466 (13.3%)                 | 586 (16.9%)                | 459 (13.2%)                 |
| Diabetes w/ complications                    | 1114 (4.5%)                               | 95 (2.7%)                   | 170 (4.9%)                 | 93 (2.7%)                   |
| Congestive heart failure                     | 921 (3.7%)                                | 52 (1.5%)                   | 127 (3.7%)                 | 52 (1.5%)                   |
| Myocardial infarction                        | 264 (1.1%)                                | 30 (0.9%)                   | 29 (0.8%)                  | 29 (0.8%)                   |
| Peripheral vascular disease                  | 1394 (5.6%)                               | 77 (2.2%)                   | 191 (5.5%)                 | 77 (2.2%)                   |
| Chronic pulmonary disease                    | 4758 (19.0%)                              | 427 (12.2%)                 | 691 (19.9%)                | 425 (12.2%)                 |
| Cerebrovascular disease                      | 1145 (4.9%)                               | 80 (2.3%)                   | 148 (4.3%)                 | 80 (2.3%)                   |
| Dementia                                     | 178 (0.7%)                                | 3 (0.1%)                    | 18 (0.5%)                  | 3 (0.1%)                    |
| Hemiparaplegia                               | 101 (0.4%)                                | 6 (0.2%)                    | 10 (0.3%)                  | 6 (0.2%)                    |
| Mild liver disease                           | 835 (3.4%)                                | 91 (2.6%)                   | 149 (4.3%)                 | 89 (2.6%)                   |
| Severe liver disease                         | 46 (0.2%)                                 | 5 (0.1%)                    | 11 (0.3%)                  | 5 (0.1%)                    |
| Renal disease                                | 1295 (5.2%)                               | 81 (2.5%)                   | 184 (5.3%)                 | 90 (2.6%)                   |

|                      |              |              |              |              |
|----------------------|--------------|--------------|--------------|--------------|
| Peptic ulcer disease | 346 (1.4%)   | 16 (0.5%)    | 55 (1.6%)    | 16 (0.5%)    |
| Rheumatic disease    | 7258 (29.0%) | 2366 (67.5%) | 1299 (37.4%) | 2341 (67.3%) |
| HIV                  | 40 (0.2%)    | 3 (0.1%)     | 9 (0.3%)     | 3 (0.1%)     |

**Caption:** The TNF $\alpha$ -FP cohort used etanercept. Grey highlight indicates characteristics with standardized mean difference >0.25 between groups. Patients in the two cohorts were propensity score-matched on sex, age, race/ethnicity, and CCI score. Abbreviations: anti-TNF $\alpha$ , tumor necrosis factor-alpha inhibitor; CCI, Charlson Comorbidity Index; EHR, electronic health records; FP, fusion protein; HIV, human immunodeficiency virus; SD, standard deviation. Notes: <sup>a</sup> Demographic and clinical characteristics are among patients who met the inclusion criteria for history (90 days) and follow-up (6 months) in the EHR database. <sup>b</sup> The cohort was comprised of 25,000 randomly selected patients with no anti-TNF $\alpha$  use. <sup>c</sup> 'Other' includes all other race/ethnicities as well as when this information was missing.

**Table S5. Demographic and clinical characteristics of the Yes-TNF $\alpha$  cohort and a randomly selected No-TNF $\alpha$  cohort (age 30-50 years), before and after propensity score matching**

|                                              | Autoimmune disorders cohorts (age 30-50 years) <sup>a</sup> |                             |                            |                             |
|----------------------------------------------|-------------------------------------------------------------|-----------------------------|----------------------------|-----------------------------|
|                                              | Before matching                                             |                             | After matching             |                             |
|                                              | No-TNF $\alpha$<br>N=25,000 <sup>b</sup>                    | Yes-TNF $\alpha$<br>N=4,397 | No-TNF $\alpha$<br>N=4,340 | Yes-TNF $\alpha$<br>N=4,340 |
| <b>Duration of follow-up, mean [SD] days</b> | 1477.4 [1015.2]                                             | 1611.6 [1078.0]             | 1348.5 [976.1]             | 1618.1 [1078.6]             |
| <b>Sex, n (%) female</b>                     | 15837 (63.3%)                                               | 2987 (65.9%)                | 2864 (66.0%)               | 2850 (65.7%)                |
| <b>Age, years</b>                            |                                                             |                             |                            |                             |
| Mean [SD]                                    | 40.6 [6.0]                                                  | 40.8 [6.1]                  | 40.9 [5.9]                 | 40.8 [6.1]                  |
| Distribution, n (%)                          |                                                             |                             |                            |                             |
| 30-39                                        | 11284 (45.1%)                                               | 1869 (42.5%)                | 1906 (43.9%)               | 1860 (42.9%)                |
| 40-50                                        | 13716 (54.8%)                                               | 2528 (57.5%)                | 2434 (56.1%)               | 2480 (57.1%)                |
| <b>Race/ethnicity, n (%)</b>                 |                                                             |                             |                            |                             |
| White                                        | 14436 (57.7%)                                               | 2791 (63.3%)                | 2734 (63.0%)               | 2748 (63.3%)                |
| Black                                        | 2146 (8.6%)                                                 | 233 (5.3%)                  | 268 (6.2%)                 | 32 (5.3%)                   |
| Asian                                        | 319 (1.3%)                                                  | 49 (1.1%)                   | 61 (1.4%)                  | 49 (1.1%)                   |
| Other <sup>c</sup>                           | 8099 (32.4%)                                                | 1324 (30.1%)                | 1277 (29.4%)               | 1311 (30.2%)                |
| <b>CCI</b>                                   |                                                             |                             |                            |                             |
| Mean score [SD]                              | 0.6 [1.0]                                                   | 0.6 [0.9]                   | 0.7 [1.1]                  | 0.6 [0.9]                   |
| Component disorders, n (%)                   |                                                             |                             |                            |                             |
| Malignancy                                   | 349 (1.4%)                                                  | 32 (0.7%)                   | 60 (1.4%)                  | 31 (0.7%)                   |
| Metastatic solid tumor                       | 167(0.8%)                                                   | 1 (<0.1%)                   | 3 (0.1%)                   | 1 (<0.1%)                   |
| Diabetes                                     | 2206 (8.8%)                                                 | 306 (7.0%)                  | 401 (9.2%)                 | 300 (7.0%)                  |
| Diabetes w/ complications                    | 395 (1.5%)                                                  | 51 (1.2%)                   | 78 (1.8%)                  | 50 (1.2%)                   |
| Congestive heart failure                     | 223 (1.0%)                                                  | 19 (0.4%)                   | 50 (1.2%)                  | 17 (0.4%)                   |
| Myocardial infarction                        | 76 (0.3%)                                                   | 6 (0.1%)                    | 11 (0.3%)                  | 6 (0.1%)                    |
| Peripheral vascular disease                  | 293 (1.2%)                                                  | 19 (0.4%)                   | 41 (0.9%)                  | 19 (0.4%)                   |
| Chronic pulmonary disease                    | 3800 (15.2%)                                                | 408 (9.3%)                  | 669 (15.4%)                | 402 (9.3%)                  |
| Cerebrovascular disease                      | 319 (1.3%)                                                  | 30 (0.7%)                   | 52 (1.2%)                  | 29 (0.7%)                   |
| Dementia                                     | 13 (<0.1%)                                                  | 1 (<0.1%)                   | 1 (<0.1%)                  | 1 (<0.1%)                   |
| Hemiparaplegia                               | 69 (0.3%)                                                   | 9 (0.2%)                    | 9 (0.2%)                   | 9 (0.2%)                    |
| Mild liver disease                           | 666 (2.7%)                                                  | 86 (2.0%)                   | 114 (2.6%)                 | 86 (2.0%)                   |
| Severe liver disease                         | 36 (0.2%)                                                   | 3 (0.1%)                    | 7 (0.2%)                   | 3 (0.1%)                    |
| Renal disease                                | 313 (1.3%)                                                  | 33 (0.8%)                   | 56 (1.3%)                  | 33(0.8%)                    |
| Peptic ulcer disease                         | 205 (0.8%)                                                  | 36 (0.8%)                   | 35 (0.8%)                  | 35 (0.8%)                   |
| Rheumatic disease                            | 4523 (18.1%)                                                | 1612 (36.7%)                | 963 (22.2%)                | 1575 (36.3%)                |
| HIV                                          | 85 (0.3%)                                                   | 1 (<0.1%)                   | 22 (0.5%)                  | 1 (<0.1%)                   |

**Caption:** Grey highlight indicates characteristics with standardized mean difference  $>0.25$  between groups. Patients in the two cohorts were propensity score-matched on sex, age, race/ethnicity, and CCI score. Abbreviations: CCI, Charlson Comorbidity Index; EHR, electronic health records; HIV, human immunodeficiency virus; SD, standard deviation; anti-TNF $\alpha$ , tumor necrosis factor-alpha inhibitor. Notes: <sup>a</sup> Demographic and clinical characteristics are among patients who met the inclusion criteria for history (90 days) and follow-up (6 months) in the EHR database. <sup>b</sup> The cohort was comprised of 25,000 randomly selected patients with no anti-TNF $\alpha$  use. <sup>c</sup> Other<sup>c</sup> includes all other race/ethnicities as well as when this information was missing.

**Table S6. Demographic and clinical characteristics of the Yes-TNF $\alpha$  cohort and a randomly selected No-TNF $\alpha$  cohort (age 51-70 years), before and after propensity score matching**

|                                              | Autoimmune disorders cohorts (age 51-70 years) <sup>a</sup> |                             |                            |                             |
|----------------------------------------------|-------------------------------------------------------------|-----------------------------|----------------------------|-----------------------------|
|                                              | Before matching                                             |                             | After matching             |                             |
|                                              | No-TNF $\alpha$<br>N=25,000 <sup>b</sup>                    | Yes-TNF $\alpha$<br>N=6,868 | No-TNF $\alpha$<br>N=6,412 | Yes-TNF $\alpha$<br>N=6,412 |
| <b>Duration of follow-up, mean [SD] days</b> | 1454.3 [1003.6]                                             | 1586.2 [1023.7]             | 1453.3 [989.3]             | 1608.8 [1033.5]             |
| <b>Sex, n (%) female</b>                     | 16079 (64.3%)                                               | 4572 (66.6%)                | 4199 (65.5%)               | 4223 (65.9%)                |
| <b>Age, years</b>                            |                                                             |                             |                            |                             |
| Mean [SD]                                    | 60.2 [5.6]                                                  | 59.1 [5.6]                  | 59.2 [5.5]                 | 59.1 [5.6]                  |
| Distribution, n (%)                          |                                                             |                             |                            |                             |
| 51-59                                        | 12226 (48.9%)                                               | 3877 (56.5%)                | 3660 (57.1%)               | 3581 (55.8%)                |
| 60-70                                        | 12774 (51.1%)                                               | 2991 (43.5%)                | 2752 (42.9%)               | 2831 (44.1%)                |
| <b>Race/ethnicity, n (%)</b>                 |                                                             |                             |                            |                             |
| White                                        | 15445 (61.8%)                                               | 4223 (65.9%)                | 4021 (66.8%)               | 3931 (65.3%)                |
| Black                                        | 1986 (7.9%)                                                 | 442 (6.9%)                  | 434 (7.2%)                 | 413 (6.9%)                  |
| Asian                                        | 182 (0.7%)                                                  | 45 (0.7%)                   | 54 (0.9%)                  | 45 (0.7%)                   |
| Other <sup>c</sup>                           | 7387 (29.5%)                                                | 1698 (26.5%)                | 1511 (25.1%)               | 1631 (27.1%)                |
| <b>CCI</b>                                   |                                                             |                             |                            |                             |
| Mean score [SD]                              | 2.8 [1.7]                                                   | 2.5 [1.3]                   | 2.6 [1.5]                  | 2.5 [1.3]                   |
| Component disorders, n (%)                   |                                                             |                             |                            |                             |
| Malignancy                                   | 1135 (4.5%)                                                 | 147 (2.1%)                  | 230 (3.6%)                 | 144 (2.3%)                  |
| Metastatic solid tumor                       | 66 (0.3%)                                                   | 6 (0.1%)                    | 12 (0.2%)                  | 6 (0.1%)                    |
| Diabetes                                     | 4900 (19.6%)                                                | 986 (14.4%)                 | 1129 (17.6%)               | 908 (14.2%)                 |
| Diabetes w/ complications                    | 1223 (4.9%)                                                 | 203 (3.0%)                  | 266 (4.2%)                 | 189 (3.0%)                  |
| Congestive heart failure                     | 851 (3.4%)                                                  | 113 (1.7%)                  | 172 (2.7%)                 | 111 (1.7%)                  |
| Myocardial infarction                        | 281 (1.1%)                                                  | 50 (0.7%)                   | 75 (1.2%)                  | 45 (0.7%)                   |
| Peripheral vascular disease                  | 1211 (4.8%)                                                 | 151 (2.2%)                  | 248 (3.9%)                 | 145 (2.3%)                  |
| Chronic pulmonary disease                    | 5023 (20.1%)                                                | 894 (13.0%)                 | 1219 (19.0%)               | 831 (13.0%)                 |
| Cerebrovascular disease                      | 1095 (4.9%)                                                 | 157 (2.3%)                  | 215 (3.4%)                 | 153 (2.4%)                  |
| Dementia                                     | 59 (0.2%)                                                   | 6 (0.1%)                    | 11 (0.2%)                  | 6 (0.1%)                    |
| Hemiparaplegia                               | 121 (0.5%)                                                  | 8 (0.1%)                    | 28 (0.4%)                  | 8 (0.1%)                    |
| Mild liver disease                           | 1170 (4.7%)                                                 | 200 (2.9%)                  | 271 (4.2%)                 | 193 (3.0%)                  |
| Severe liver disease                         | 78 (0.3%)                                                   | 8 (0.1%)                    | 16 (0.3%)                  | 8 (0.1%)                    |
| Renal disease                                | 1130 (4.5%)                                                 | 163 (2.4%)                  | 239 (3.7%)                 | 151 (2.4%)                  |
| Peptic ulcer disease                         | 369 (1.5%)                                                  | 58 (0.8%)                   | 79 (1.2%)                  | 55 (0.9%)                   |
| Rheumatic disease                            | 8592 (34.4%)                                                | 3848 (56.0%)                | 2446 (38.2%)               | 3531 (55.1%)                |
| HIV                                          | 53 (0.2%)                                                   | 6 (0.1%)                    | 12 (0.2%)                  | 5 (0.1%)                    |

**Caption:** Grey highlight indicates characteristics with standardized mean difference  $>0.25$  between groups. Patients in the two cohorts were propensity score-matched on sex, age, race/ethnicity, and CCI score. Abbreviations: CCI, Charlson Comorbidity Index; EHR, electronic health records; HIV, human immunodeficiency virus; SD, standard deviation; anti-TNF $\alpha$ , tumor necrosis factor-alpha inhibitor. Notes: <sup>a</sup> Demographic and clinical characteristics are among patients who met the inclusion criteria for history (90 days) and follow-up (6 months) in the EHR database. <sup>b</sup> The cohort was comprised of 25,000 randomly selected patients with no anti-TNF $\alpha$  use. <sup>c</sup> Other<sup>c</sup> includes all other race/ethnicities as well as when this information was missing.

**Table S7. Demographic and clinical characteristics of the Yes-TNF $\alpha$  cohort with  $\geq 6$  months of anti-TNF $\alpha$  use and a randomly selected No-TNF $\alpha$  cohort, before and after propensity score matching**

|                                              | Autoimmune disorders cohorts <sup>a</sup> |                                           |                            |                                           |
|----------------------------------------------|-------------------------------------------|-------------------------------------------|----------------------------|-------------------------------------------|
|                                              | Before matching                           |                                           | After matching             |                                           |
|                                              | No-TNF $\alpha$<br>N=25,000 <sup>b</sup>  | Yes-TNF $\alpha$<br>(6 months)<br>N=4,733 | No-TNF $\alpha$<br>N=4,520 | Yes-TNF $\alpha$<br>(6 months)<br>N=45,20 |
| <b>Duration of follow-up, mean [SD] days</b> | 1,418.8 [985.1]                           | 1,835.6 [1,013.8]                         | 1,475.2 [978.5]            | 1,848.2 [1,018.2]                         |
| <b>Sex, n (%) female</b>                     | 16,211 (64.8%)                            | 3,139 (66.3%)                             | 2,978 (65.9%)              | 2,976 (65.8%)                             |
| <b>Age, years</b>                            |                                           |                                           |                            |                                           |
| Mean [SD]                                    | 56.2 [17.5]                               | 51.8 [14.2]                               | 52.3 [17.3]                | 51.9 [14.2]                               |
| Distribution, n (%)                          |                                           |                                           |                            |                                           |
| 18-29                                        | 2566 (10.3%)                              | 405 (8.6%)                                | 604 (13.4%)                | 380 (8.4%)                                |
| 30-39                                        | 2524 (10.1%)                              | 608 (12.8%)                               | 602 (13.3%)                | 572 (12.7%)                               |
| 40-49                                        | 3269 (13.1%)                              | 1004 (21.2%)                              | 709 (15.7%)                | 942 (20.8%)                               |
| 50-59                                        | 4998 (20%)                                | 1292 (27.3%)                              | 916 (20.3%)                | 1250 (27.7%)                              |
| 60-69                                        | 5471 (21.9%)                              | 965 (20.4%)                               | 942 (20.8%)                | 930 (20.6%)                               |
| 70-79                                        | 4339 (17.4%)                              | 383 (8.1%)                                | 550 (12.2%)                | 372 (8.2%)                                |
| 80-89                                        | 1833 (7.3%)                               | 76 (1.6%)                                 | 197 (4.4%)                 | 74 (1.6%)                                 |
| <b>Race/ethnicity, n (%)</b>                 |                                           |                                           |                            |                                           |
| White                                        | 15421 (61.7%)                             | 3118 (65.9%)                              | 2927 (64.8%)               | 2958 (65.4%)                              |
| Black                                        | 1953 (7.8%)                               | 281 (5.9%)                                | 297 (6.6%)                 | 272 (6%)                                  |
| Asian                                        | 204 (0.8%)                                | 43 (0.9%)                                 | 44 (1%)                    | 42 (0.9%)                                 |
| Other <sup>c</sup>                           | 7422 (29.7%)                              | 1291 (27.3%)                              | 1252 (27.7%)               | 1248 (27.6%)                              |
| <b>CCI</b>                                   |                                           |                                           |                            |                                           |
| Mean score [SD]                              | 2.6 [2.4]                                 | 1.9 [1.7]                                 | 2.1 [2.1]                  | 1.9 [1.7]                                 |
| Component disorders, n (%)                   |                                           |                                           |                            |                                           |
| Malignancy                                   | 1129 (4.5%)                               | 84 (1.8%)                                 | 150 (3.3%)                 | 83 (1.8%)                                 |
| Metastatic solid tumor                       | 58 (0.2%)                                 | 2 (0.04%)                                 | 4 (0.1%)                   | 2 (<0.1%)                                 |
| Diabetes                                     | 4086 (16.3%)                              | 525 (11.1%)                               | 562 (12.4%)                | 502 (11.1%)                               |
| Diabetes w/ complications                    | 1093 (4.4%)                               | 108 (2.3%)                                | 130 (2.9%)                 | 104 (2.3%)                                |
| Congestive heart failure                     | 987 (4.0%)                                | 54 (1.1%)                                 | 117 (2.6%)                 | 53 (1.8%)                                 |
| Myocardial infarction                        | 271 (1.1%)                                | 29 (0.6%)                                 | 38 (0.8%)                  | 27 (0.6%)                                 |
| Peripheral vascular disease                  | 1465 (5.9%)                               | 81 (1.7%)                                 | 185 (4.1%)                 | 80 (1.8%)                                 |
| Chronic pulmonary disease                    | 4893 (19.6%)                              | 543 (11.5%)                               | 744 (16.5%)                | 521 (11.5%)                               |
| Cerebrovascular disease                      | 1294 (5.2%)                               | 100 (2.1%)                                | 162 (3.6%)                 | 94 (2.1%)                                 |
| Dementia                                     | 192 (0.8%)                                | 2 (0.04%)                                 | 12 (0.3%)                  | 2 (<0.1%)                                 |
| Hemiparaplegia                               | 99 (0.4%)                                 | 7 (0.6%)                                  | 7 (0.2%)                   | 7 (0.2%)                                  |
| Mild liver disease                           | 833 (3.33%)                               | 90 (1.9%)                                 | 125 (2.8%)                 | 90 (2.0%)                                 |

|                      |               |              |              |              |
|----------------------|---------------|--------------|--------------|--------------|
| Severe liver disease | 55 (0.22%)    | 6 (0.1%)     | 8 (0.2%)     | 6 (0.1%)     |
| Renal disease        | 1406 (5.62%)  | 82 (1.7%)    | 158 (3.5%)   | 80 (1.8%)    |
| Peptic ulcer disease | 344 (1.38%)   | 48 (1.0%)    | 38 (0.8%)    | 47 (1.0%)    |
| Rheumatic disease    | 7152 (28.61%) | 2250 (47.5%) | 1358 (30.0%) | 2123 (47.0%) |
| HIV                  | 49 (0.2%)     | 0 (0%)       | 8 (0.2%)     | 0 (0%)       |

**Caption:** Grey highlight indicates characteristics with standardized mean difference >0.25 between groups. Patients in the two cohorts were propensity score-matched on sex, age, race/ethnicity, and CCI score. Abbreviations: CCI, Charlson Comorbidity Index; EHR, electronic health records; HIV, human immunodeficiency virus; SD, standard deviation; anti-TNF $\alpha$ , tumor necrosis factor-alpha inhibitor. Notes: <sup>a</sup> Demographic and clinical characteristics are among patients who met the inclusion criteria for history (90 days) and follow-up (6 months) in the EHR database. <sup>b</sup> The cohort was comprised of 25,000 randomly selected patients with no anti-TNF $\alpha$  use. <sup>c</sup> Other<sup>c</sup> includes all other race/ethnicities as well as when this information was missing.



**Table S8. Demographic and clinical characteristics of the Yes-TNF $\alpha$  cohort with  $\geq 12$  months of anti-TNF $\alpha$  use and a randomly selected No-TNF $\alpha$  cohort, before and after propensity score matching**

|                                              | Autoimmune disorders cohorts <sup>a</sup> |                                            |                            |                                            |
|----------------------------------------------|-------------------------------------------|--------------------------------------------|----------------------------|--------------------------------------------|
|                                              | Before matching                           |                                            | After matching             |                                            |
|                                              | No-TNF $\alpha$<br>N=25,000 <sup>b</sup>  | Yes-TNF $\alpha$<br>(12 months)<br>N=3,516 | No-TNF $\alpha$<br>N=3,466 | Yes-TNF $\alpha$<br>(12 months)<br>N=3,466 |
| <b>Duration of follow-up, mean [SD] days</b> | 1,418.8 [985.1]                           | 2,014.9 [995.8]                            | 1,521.1 [975.4]            | 2016.3 [999.0]                             |
| <b>Sex, n (%) female</b>                     | 16,211 (64.8%)                            | 2,298 (65.4%)                              | 2,294 (66.2%)              | 22,61 (65.2%)                              |
| <b>Age, years</b>                            |                                           |                                            |                            |                                            |
| Mean [SD]                                    | 56.2 [17.5]                               | 51.6 [14.2]                                | 51.6 [17.4]                | 51.7 [14.2]                                |
| Distribution, n (%)                          |                                           |                                            |                            |                                            |
| 18-29                                        | 2566 (10.3%)                              | 303 (8.6%)                                 | 494 (14.3%)                | 294 (8.5%)                                 |
| 30-39                                        | 2524 (10.1%)                              | 466 (13.3%)                                | 476 (13.7%)                | 457 (13.2%)                                |
| 40-49                                        | 3269 (13.1%)                              | 742 (21.1%)                                | 574 (16.6%)                | 728 (21%)                                  |
| 50-59                                        | 4998 (20%)                                | 960 (27.3%)                                | 681 (19.6%)                | 954 (27.5%)                                |
| 60-69                                        | 5471 (21.9%)                              | 704 (20%)                                  | 688 (19.8%)                | 697 (20.1%)                                |
| 70-79                                        | 4339 (17.4%)                              | 284 (8.1%)                                 | 408 (11.8%)                | 279 (8%)                                   |
| 80-89                                        | 1833 (7.3%)                               | 57 (1.6%)                                  | 145 (4.2%)                 | 57 (1.6%)                                  |
| <b>Race/ethnicity, n (%)</b>                 |                                           |                                            |                            |                                            |
| White                                        | 15421 (61.7%)                             | 2275 (64.7%)                               | 2244 (64.7)                | 2238 (64.6)                                |
| Black                                        | 1953 (7.8%)                               | 196 (5.6%)                                 | 236 (6.8)                  | 194 (5.6)                                  |
| Asian                                        | 204 (0.8%)                                | 31 (0.9%)                                  | 27 (0.8)                   | 31 (0.9)                                   |
| Other <sup>c</sup>                           | 7422 (29.7%)                              | 1014 (28.8%)                               | 959 (27.7)                 | 1003 (28.9)                                |
| <b>CCI</b>                                   |                                           |                                            |                            |                                            |
| Mean score [SD]                              | 2.6 [2.4]                                 | 1.9 [1.7]                                  | 2 [2.1]                    | 1.9 [1.7]                                  |
| Component disorders, n (%)                   |                                           |                                            |                            |                                            |
| Malignancy                                   | 1129 (4.5%)                               | 63 (1.8%)                                  | 99 (2.9%)                  | 62 (1.8%)                                  |
| Metastatic solid tumor                       | 58 (0.2%)                                 | 2 (0.1%)                                   | 7 (0.2%)                   | 2 (0.1%)                                   |
| Diabetes                                     | 4086 (16.3%)                              | 381 (10.8%)                                | 407 (11.7%)                | 374 (10.8%)                                |
| Diabetes w/ complications                    | 1093 (4.3%)                               | 68 (1.9%)                                  | 89 (2.6%)                  | 68 (2.0%)                                  |
| Congestive heart failure                     | 987 (3.9%)                                | 35 (1%)                                    | 92 (2.7%)                  | 35 9 (1.0%)                                |
| Myocardial infarction                        | 271 (1.9%)                                | 21 (0.6%)                                  | 27 (0.8%)                  | 21 (0.6%)                                  |
| Peripheral vascular disease                  | 1465 (5.9%)                               | 59 (1.7%)                                  | 120 (3.5%)                 | 59 (1.7%)                                  |
| Chronic pulmonary disease                    | 4893 (19.6%)                              | 377 (10.7%)                                | 536 (15.5%)                | 374 (10.8%)                                |
| Cerebrovascular disease                      | 1294 (5.2%)                               | 79 (2.3%)                                  | 117 (3.4%)                 | 77 (2.2%)                                  |
| Dementia                                     | 192 (0.8%)                                | 1 (<0.1%)                                  | 14 (0.4%)                  | 1 (<0.1%)                                  |
| Hemiparaplegia                               | 99 (0.4%)                                 | 5 (0.1%)                                   | 7 (0.2%)                   | 5 (0.1%)                                   |
| Mild liver disease                           | 833 (3.3%)                                | 60 (1.7%)                                  | 88 (2.5%)                  | 60 (1.7%)                                  |

|                      |              |              |              |              |
|----------------------|--------------|--------------|--------------|--------------|
| Severe liver disease | 55 (0.2%)    | 3 (0.1%)     | 5 (0.1%)     | 3 (0.1%)     |
| Renal disease        | 1406 (5.6%)  | 60 (1.7%)    | 120 (3.5%)   | 59 (1.7%)    |
| Peptic ulcer disease | 344 (1.4%)   | 38 (1.1%)    | 38 (1.1%)    | 37 (1.1%)    |
| Rheumatic disease    | 7152 (28.6%) | 1659 (47.2%) | 1001 (28.9%) | 1635 (47.2%) |
| HIV                  | 49 (0.2%)    | 0 (0%)       | 5 (0.1%)     | 0 (0%)       |

**Caption:** Grey highlight indicates characteristics with standardized mean difference >0.25 between groups. Patients in the two cohorts were propensity score-matched on sex, age, race/ethnicity, and CCI score. Abbreviations: CCI, Charlson Comorbidity Index; EHR, electronic health records; HIV, human immunodeficiency virus; SD, standard deviation; anti-TNF $\alpha$ , tumor necrosis factor-alpha inhibitor. Notes: <sup>a</sup> Demographic and clinical characteristics are among patients who met the inclusion criteria for history (90 days) and follow-up (6 months) in the EHR database. <sup>b</sup> The cohort was comprised of 25,000 randomly selected patients with no anti-TNF $\alpha$  use. <sup>c</sup> Other<sup>c</sup> includes all other race/ethnicities as well as when this information was missing.

**Table S9. Demographic and clinical characteristics of the Yes-TNF $\alpha$  cohort with RA and a randomly selected No-TNF $\alpha$  cohort with RA, before and after propensity score matching**

|                                              | RA cohorts <sup>a</sup>                  |                             |                            |                             |
|----------------------------------------------|------------------------------------------|-----------------------------|----------------------------|-----------------------------|
|                                              | Before matching                          |                             | After matching             |                             |
|                                              | No-TNF $\alpha$<br>N=25,000 <sup>b</sup> | Yes-TNF $\alpha$<br>N=6,824 | No-TNF $\alpha$<br>N=6,517 | Yes-TNF $\alpha$<br>N=6,517 |
| <b>Duration of follow-up, mean [SD] days</b> | 1281.9 [946.9]                           | 1519.7 [1003.6]             | 1340.1 [966.9]             | 1528.3 [1009.6]             |
| <b>Sex, n (%) female</b>                     | 18802 (75.2%)                            | 5205 (76.3%)                | 5001 (76.7%)               | 4958 (76.1%)                |
| <b>Age, years</b>                            |                                          |                             |                            |                             |
| Mean [SD]                                    | 63 [13.7]                                | 57.2 [13.0]                 | 57.2 [14.3]                | 57.6 [12.9]                 |
| Distribution, n (%)                          |                                          |                             |                            |                             |
| 18-29                                        | 478 (1.9%)                               | 217 (3.2%)                  | 255 (3.9%)                 | 198 (3%)                    |
| 30-39                                        | 1147 (4.6%)                              | 502 (7.4%)                  | 581 (8.9%)                 | 462 (7.1%)                  |
| 40-49                                        | 2597 (10.4%)                             | 1125 (16.5%)                | 1154 (17.7%)               | 995 (15.3%)                 |
| 50-59                                        | 5316 (21.3%)                             | 1980 (29%)                  | 1659 (25.5%)               | 1902 (29.2%)                |
| 60-69                                        | 7009 (28%)                               | 1877 (27.5%)                | 1599 (24.5%)               | 1848 (28.4%)                |
| 70-79                                        | 6057 (24.2%)                             | 939 (13.8%)                 | 985 (15.1%)                | 928 (14.2%)                 |
| 80-89                                        | 2396 (9.6%)                              | 184 (2.7%)                  | 284 (4.4%)                 | 184 (2.8%)                  |
| <b>Race/ethnicity, n (%)</b>                 |                                          |                             |                            |                             |
| White                                        | 14643 (58.6%)                            | 4367 (64%)                  | 4081 (62.6)                | 4144 (63.6%)                |
| Black                                        | 2564 (10.3%)                             | 574 (8.4%)                  | 612 (9.4)                  | 551 (8.5%)                  |
| Asian                                        | 189 (0.8%)                               | 51 (0.7%)                   | 59 (0.9)                   | 50 (0.8%)                   |
| Other <sup>c</sup>                           | 7604 (30.4%)                             | 1832 (26.8%)                | 1765 (27.1)                | 1772 (27.2%)                |
| <b>CCI</b>                                   |                                          |                             |                            |                             |
| Mean score [SD]                              | 3.9 [2.2]                                | 2.9 [1.7]                   | 2.9 [1.8]                  | 3 [1.7]                     |
| Component disorders, n (%)                   |                                          |                             |                            |                             |
| Malignancy                                   | 1333 (5.33%)                             | 135 (1.98%)                 | 174 (2.7%)                 | 134 (2.1%)                  |
| Metastatic solid tumor                       | 79 (0.32%)                               | 10 (0.15%)                  | 5 (0.1%)                   | 10 (0.2%)                   |
| Diabetes                                     | 4560 (18.24%)                            | 889 (13.03%)                | 774 (11.9%)                | 865 (13.3%)                 |
| Diabetes w/ complications                    | 1287 (5.15%)                             | 188 (2.75%)                 | 153 (2.4%)                 | 185 (2.8%)                  |
| Congestive heart failure                     | 1261 (5.04%)                             | 117 (1.71%)                 | 131 (2.0%)                 | 115 (1.8%)                  |
| Myocardial infarction                        | 310 (1.24%)                              | 56 (0.82%)                  | 42 (0.6%)                  | 53 (0.8%)                   |
| Peripheral vascular disease                  | 1547 (6.19%)                             | 181 (2.65%)                 | 201 (3.1%)                 | 180 (2.8%)                  |
| Chronic pulmonary disease                    | 4981 (19.92%)                            | 898 (13.16%)                | 1003 (15.4%)               | 875 (13.4%)                 |
| Cerebrovascular disease                      | 1423 (5.69%)                             | 195 (2.86%)                 | 176 (2.7%)                 | 194 (3.0%)                  |
| Dementia                                     | 244 (0.98%)                              | 11 (0.16%)                  | 17 (0.3%)                  | 11 (0.2%)                   |
| Hemiparaplegia                               | 85 (0.34%)                               | 11 (0.16%)                  | 8 (0.1%)                   | 11 (0.2%)                   |
| Mild liver disease                           | 850 (3.4%)                               | 159 (2.33%)                 | 154 (2.4%)                 | 158 (2.4%)                  |
| Severe liver disease                         | 43 (0.17%)                               | 5 (0.07%)                   | 7 (0.1%)                   | 5 (0.1%)                    |

|                      |              |             |             |             |
|----------------------|--------------|-------------|-------------|-------------|
| Renal disease        | 1792 (7.17%) | 204 (2.99%) | 203 (3.1%)  | 203 (3.1%)  |
| Peptic ulcer disease | 342 (1.37%)  | 49 (0.72%)  | 55 (0.8%)   | 48 (0.7%)   |
| Rheumatic disease    | 25000 (100%) | 6824 (100%) | 6517 (100%) | 6517 (100%) |
| HIV                  | 43 (0.17%)   | 3 (0.04%)   | 4 (0.1%)    | 3 (0.1%)    |

**Caption:** Grey highlight indicates characteristics with standardized mean difference >0.25 between groups. Patients in the two cohorts were propensity score-matched on sex, age, race/ethnicity, and CCI score. Abbreviations: CCI, Charlson Comorbidity Index; EHR, electronic health records; HIV, human immunodeficiency virus; RA, rheumatoid arthritis; SD, standard deviation; anti-TNF $\alpha$ , tumor necrosis factor-alpha inhibitor. Notes: <sup>a</sup> Demographic and clinical characteristics are among patients who met the inclusion criteria for history (90 days) and follow-up (6 months) in the EHR database. <sup>b</sup> The cohort was comprised of 25,000 randomly selected patients with no ant-TNF $\alpha$  use. <sup>c</sup> Other' includes all other race/ethnicities as well as when this information was missing.

**Figure S2. Unmatched, basic-matched, and propensity score-matched comparisons of tinnitus incidence between patients with autoimmune disorders, by use of TNF $\alpha$ -AB (a-c) or TNF $\alpha$ -FP (d-f) compared to no anti-TNF $\alpha$  therapy**

### TNF $\alpha$ -AB vs. No-TNF $\alpha$

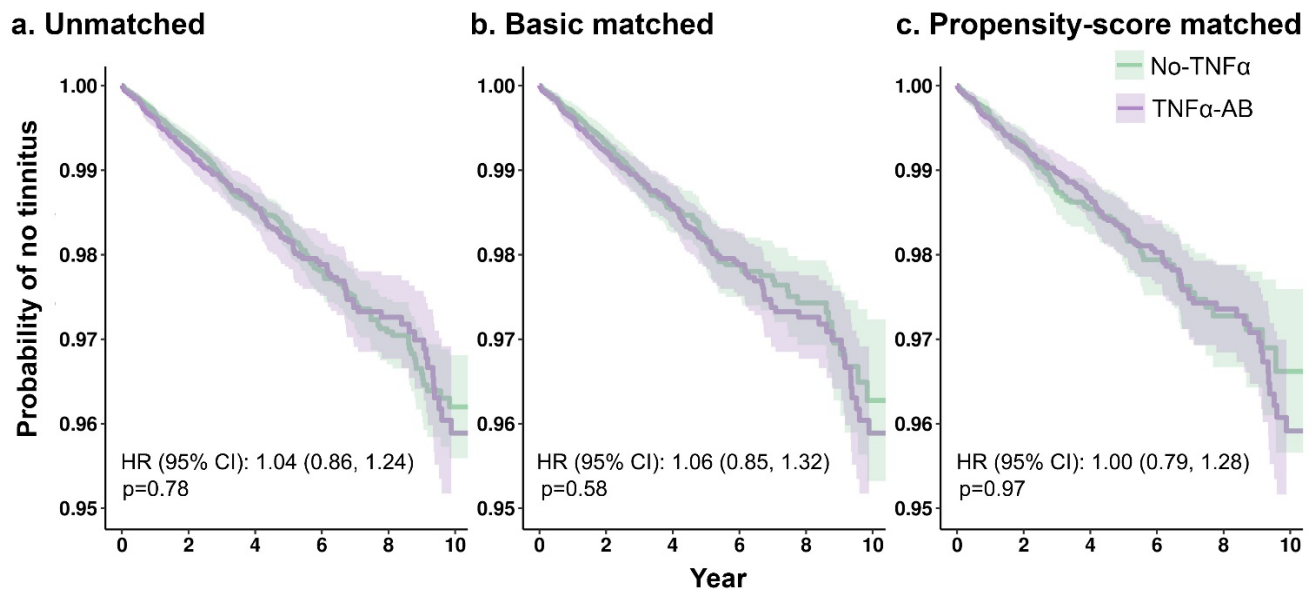

### TNF $\alpha$ -FP vs. No-TNF $\alpha$

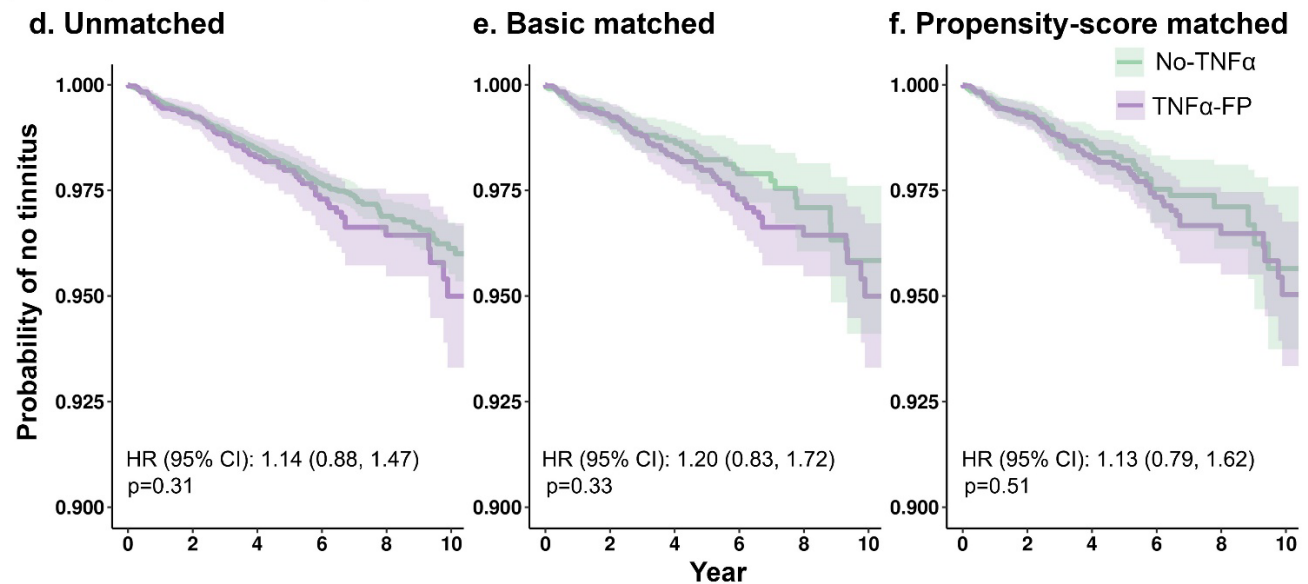

**Caption:** Abbreviations: AB, monoclonal antibody; anti-TNF $\alpha$ , tumor necrosis factor-alpha inhibitor; CI, confidence interval; FP, fusion protein; HR, hazard ratio.

**Figure S3. Unmatched, basic-matched, and propensity score-matched comparisons of tinnitus incidence between patients with autoimmune disorders, by use of anti-TNF $\alpha$  for  $\geq 6$  months (a-c) or  $\geq 12$  months (d-f) compared to no anti-TNF $\alpha$  therapy**

**$\geq 6$  months of anti-TNF $\alpha$  therapy**

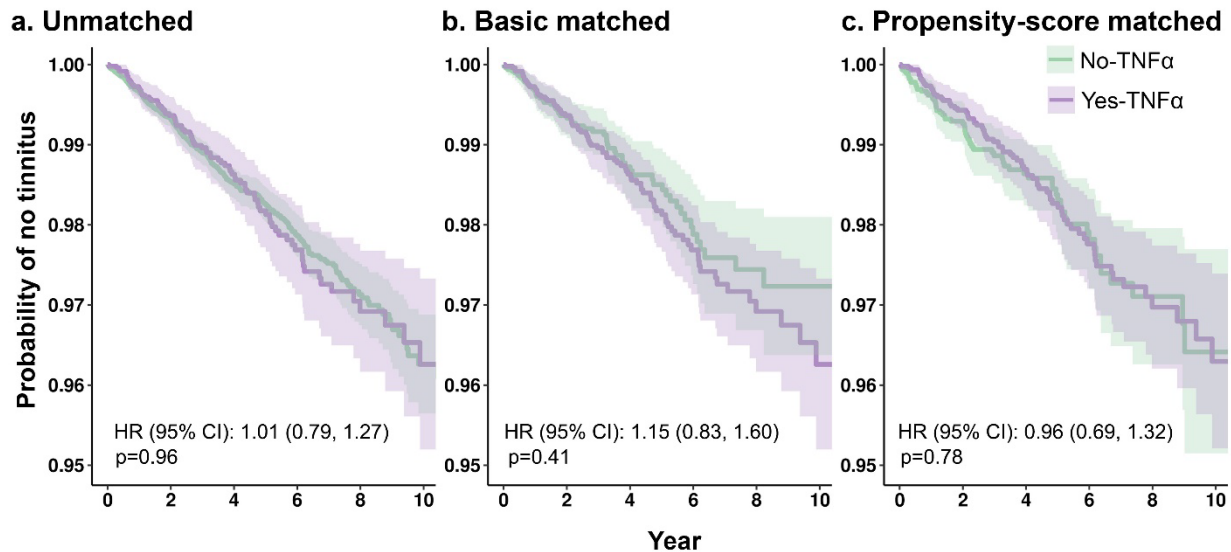

**$\geq 12$  months of anti-TNF $\alpha$  therapy**

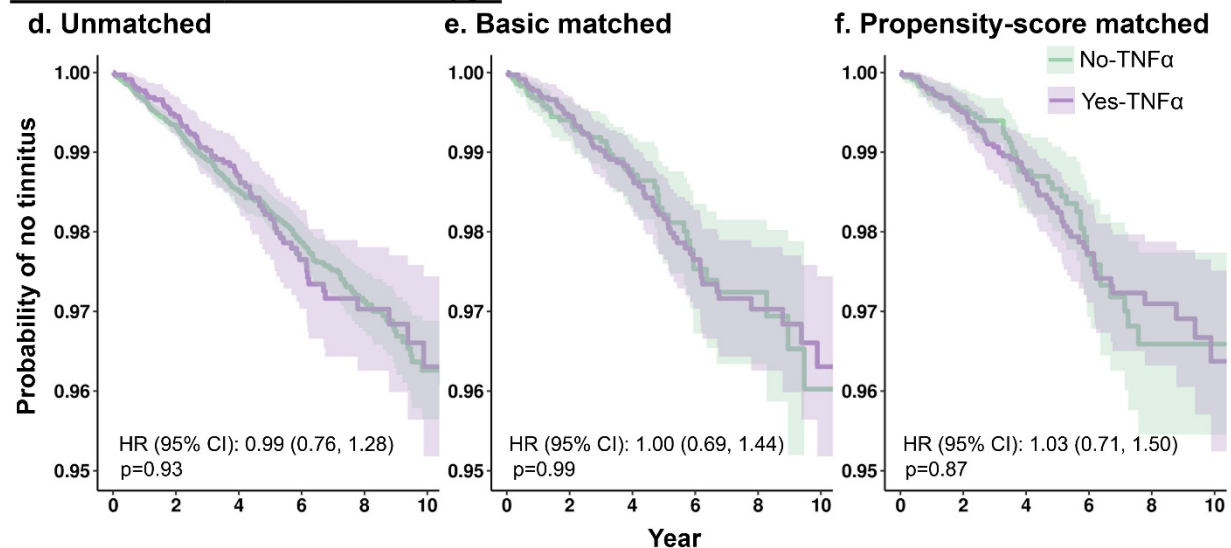

**Caption:** Abbreviations: anti-TNF $\alpha$ , tumor necrosis factor-alpha inhibitor; CI, confidence interval; HR, hazard ratio.

**Figure S4. Unmatched (a), basic-matched (b), and propensity score-matched (c) comparisons of tinnitus incidence between patients with RA, by use of anti-TNF $\alpha$  therapy or no anti-TNF $\alpha$  therapy**

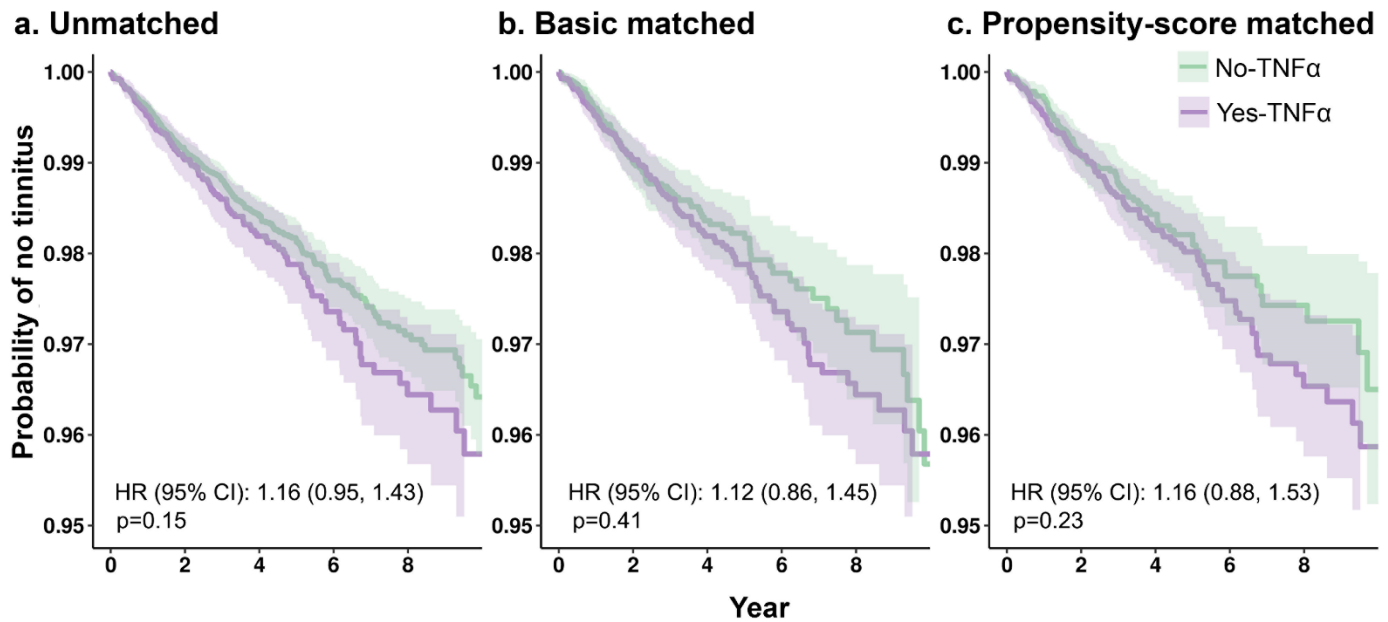

**Caption:** Abbreviations: anti-TNF $\alpha$ , tumor necrosis factor-alpha inhibitor; CI, confidence interval; HR, hazard ratio; RA, rheumatoid arthritis.
